# Supplementary material for: Prognostic comparison between radical prostatectomy and radiotherapy in prostate cancer patients at different stages and ages
Source: Aging (Albany NY). 2021 Jun 29;13(12):16773–85. doi: 10.18632/aging.203198 (PMC8266375; doi:10.18632/aging.203198)
Supplement: Supplementary Table 1 [file aging-13-203198-s001.pdf]

## SUPPLEMENTARY TABLE

**Supplementary Table 1. Hazard ratios (HRs) with 95% confidence intervals (95% CIs) of prostate cancer (PCa) deaths for men received both prostatectomy and radiotherapy versus only prostatectomy or radiotherapy in PLCO.**

| PLCO                                                          | No. of patients<br>(deaths/total) | HR <sup>a</sup> | 95% CI <sup>a</sup> | <i>p</i> <sup>a</sup> | HR <sup>b</sup> | 95% CI <sup>b</sup> | <i>p</i> <sup>b</sup> |
|---------------------------------------------------------------|-----------------------------------|-----------------|---------------------|-----------------------|-----------------|---------------------|-----------------------|
| Both prostatectomy and<br>radiotherapy Verse<br>prostatectomy | 301/3, 105                        | 1.23            | 0.75–2.00           | 0.42                  | 1.13            | 0.67–1.90           | 0.64                  |
| Both prostatectomy and<br>radiotherapy Verse<br>radiotherapy  | 510/3, 579                        | 0.82            | 0.50–1.33           | 0.41                  | 0.83            | 0.50–1.38           | 0.47                  |

<sup>a</sup>unadjusted.

<sup>b</sup>adjusted age at diagnosis (5-year groups), TNM stage (continuous), grade (continuous), smoke (categorical), education levels (continuous), race (categorical), body mass index (continuous), aspirin does (continuous), diabetes (categorical) and family history (categorical).

Abbreviation: PLCO, the Prostate, Lung, Colorectal, and Ovarian.
